# Supplementary material for: Postprandial dietary fatty acids exert divergent inflammatory responses in retinal-pigmented epithelium cells
Source: Royal Society of Chemistry journal article supplement (doi:10.1039/c6fo00136j), 2016-01-01
Supplement: c6fo00136j1.pdf [file c6fo00136j1.pdf]

### Supplemental Fig. 1

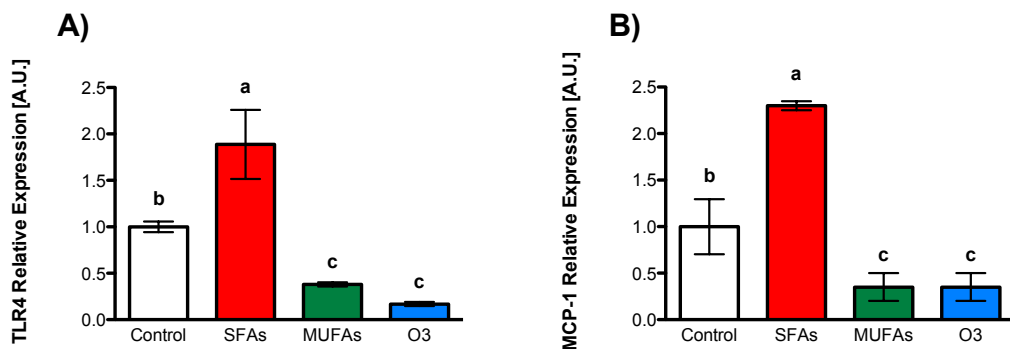

**Fig. S1.** Gene expression relative to control untreated cells of TLR4 (A) and MCP-1 (B) after the treatment with postprandial TRLs (SFAs, MUFAs, and MUFAs+omega-3 PUFAs as O3) at 100  $\mu\text{g}$  TG/mL for 24 h. Values are presented as means  $\pm$  SD (n = 3). Different letters denote statistical differences (P < 0.05).
